# Supplementary material for: Yunnanterpene G, a spiro-triterpene from the roots of Cimicifuga foetida, downregulates the expression of CD147 and MMPs in PMA differentiated THP-1 cells
Source: Royal Society of Chemistry journal article supplement (doi:10.1039/c8ra01895b), 2018-01-01
Supplement: c8ra01895b1.pdf [file c8ra01895b1.pdf]

**Yunnanterpene G , a Spiro-triterpene from the Roots of  
*Cimicifuga foetida* Down-regulates the Expressions of CD147  
and MMPs in PMA Differentiated THP-1 Cells**

Ni-Hong Lu,<sup>a</sup> Zi-Wei Zhang,<sup>b</sup> Rui-Wei Guo,<sup>b</sup> Li-Xia Yang,<sup>b,\*</sup> Ya-Xian Song,<sup>a</sup> Jin-Shan  
Ye,<sup>b</sup> Yan-Kun Shi<sup>b</sup>

<sup>a</sup>Department of Postgraduate, Kunming Medical University, Yunnan, 650500, China

<sup>b</sup>Department of Cardiology, Kunming General Hospital of Chengdu Military Area, Yunnan,  
650032, China

### Supporting Information List

Page 3-12,  $^1\text{H}$ ,  $^{13}\text{C}$ , HSQC, HMBC, COSY and ROESY NMR spectra, UV and IR spectra, and OR and HREIMS experiments of compound **1**.

Page 13, **Figure S11**. Cell morphology and expression of CD68 and CD11b of differentiated and undifferentiated THP-1 cells

Page 14, **Table S1**. Primers' information for CD147 and MMPs in the present study

**Figure S1.**  $^1\text{H}$  (100 Hz) NMR Spectrum of Yunnanterpene G (**1**) in Pyridine- $d_5$

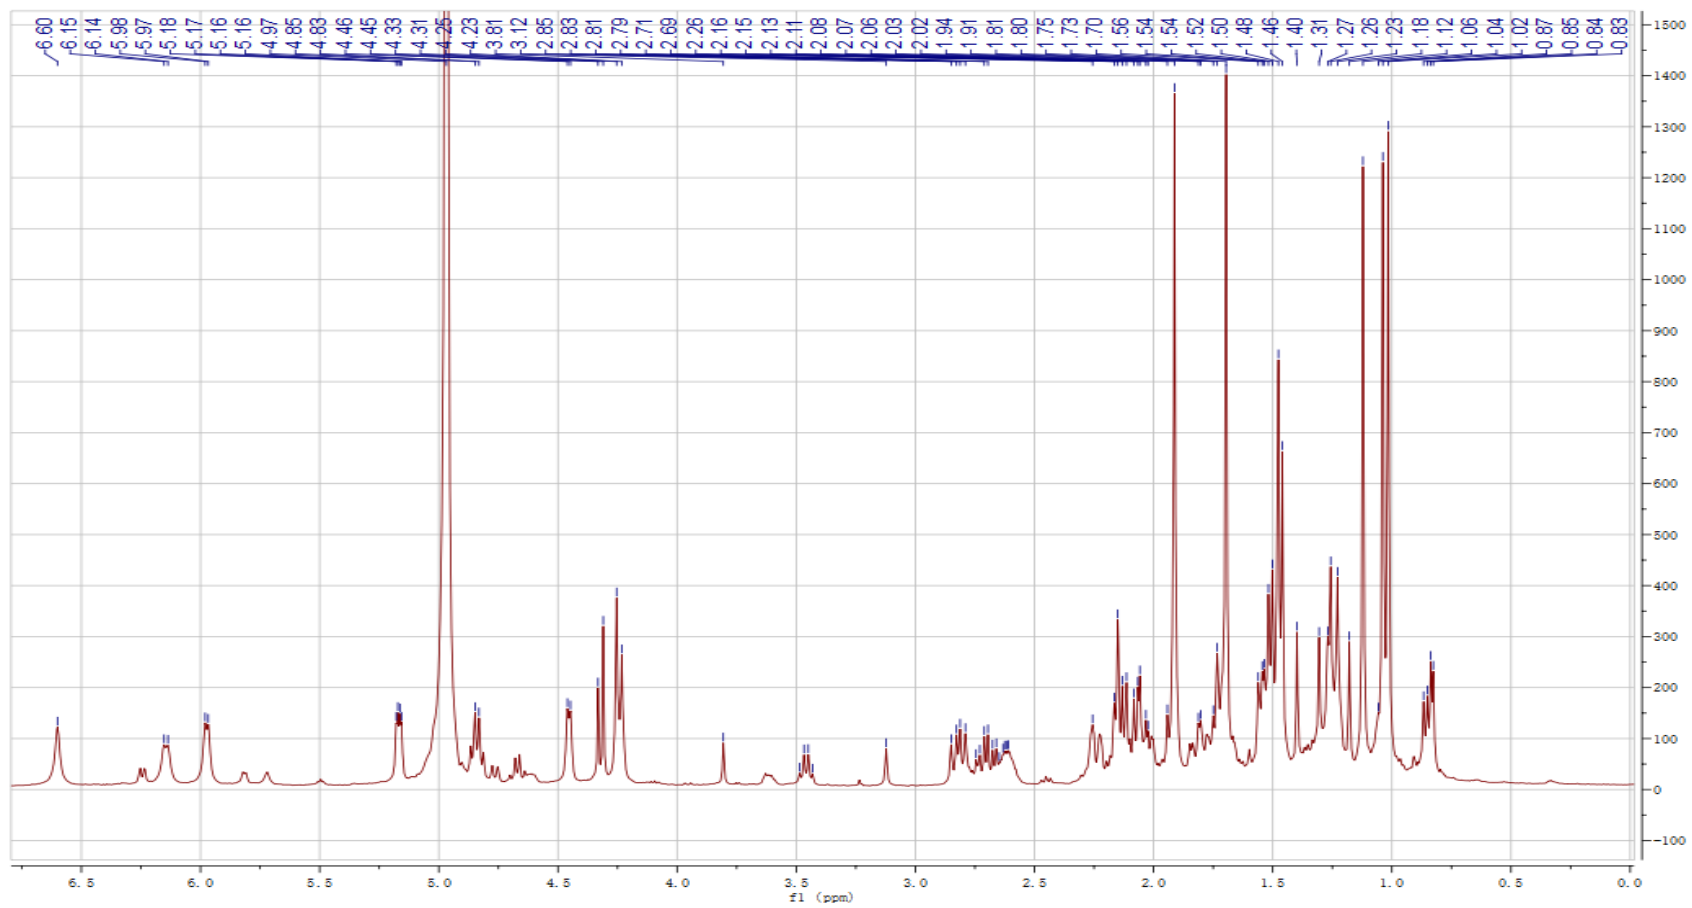

**Figure S2.**  $^{13}\text{C}$  (150 Hz) NMR Spectrum of Yunnanterpene G (**1**) in Pyridine- $d_5$

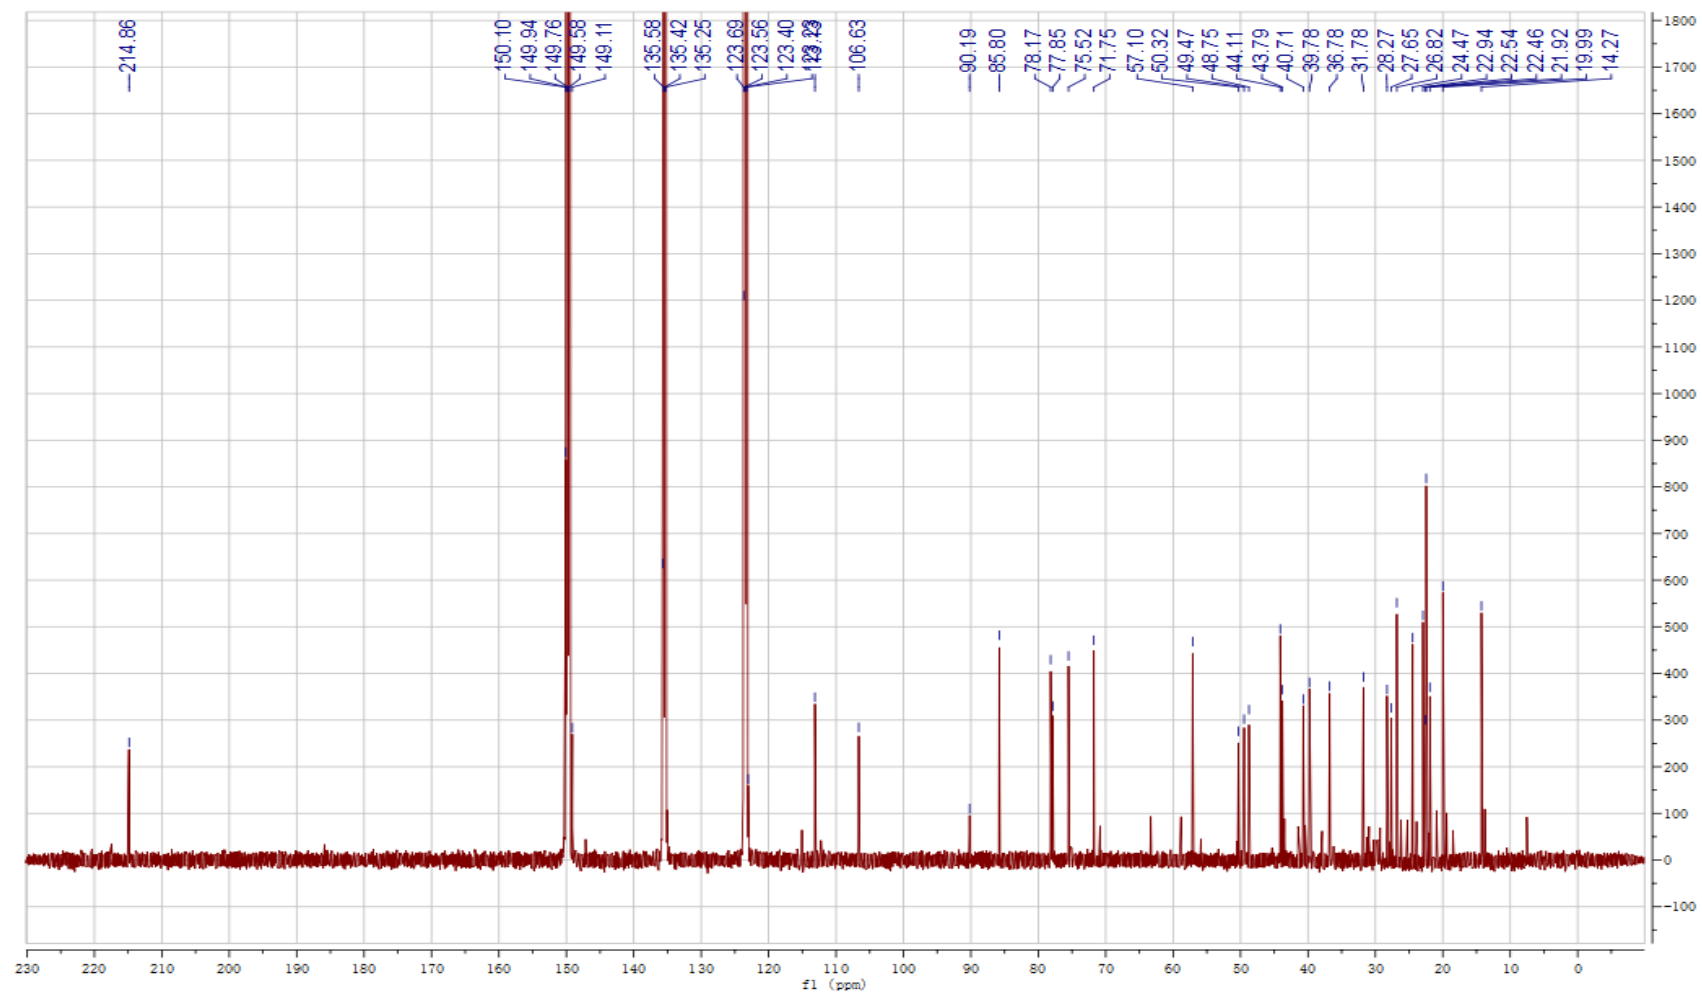

**Figure S3.** HSQC (600 Hz) Spectrum of Yunnanterpene G (**1**) in Pyridine-*d*<sub>5</sub>

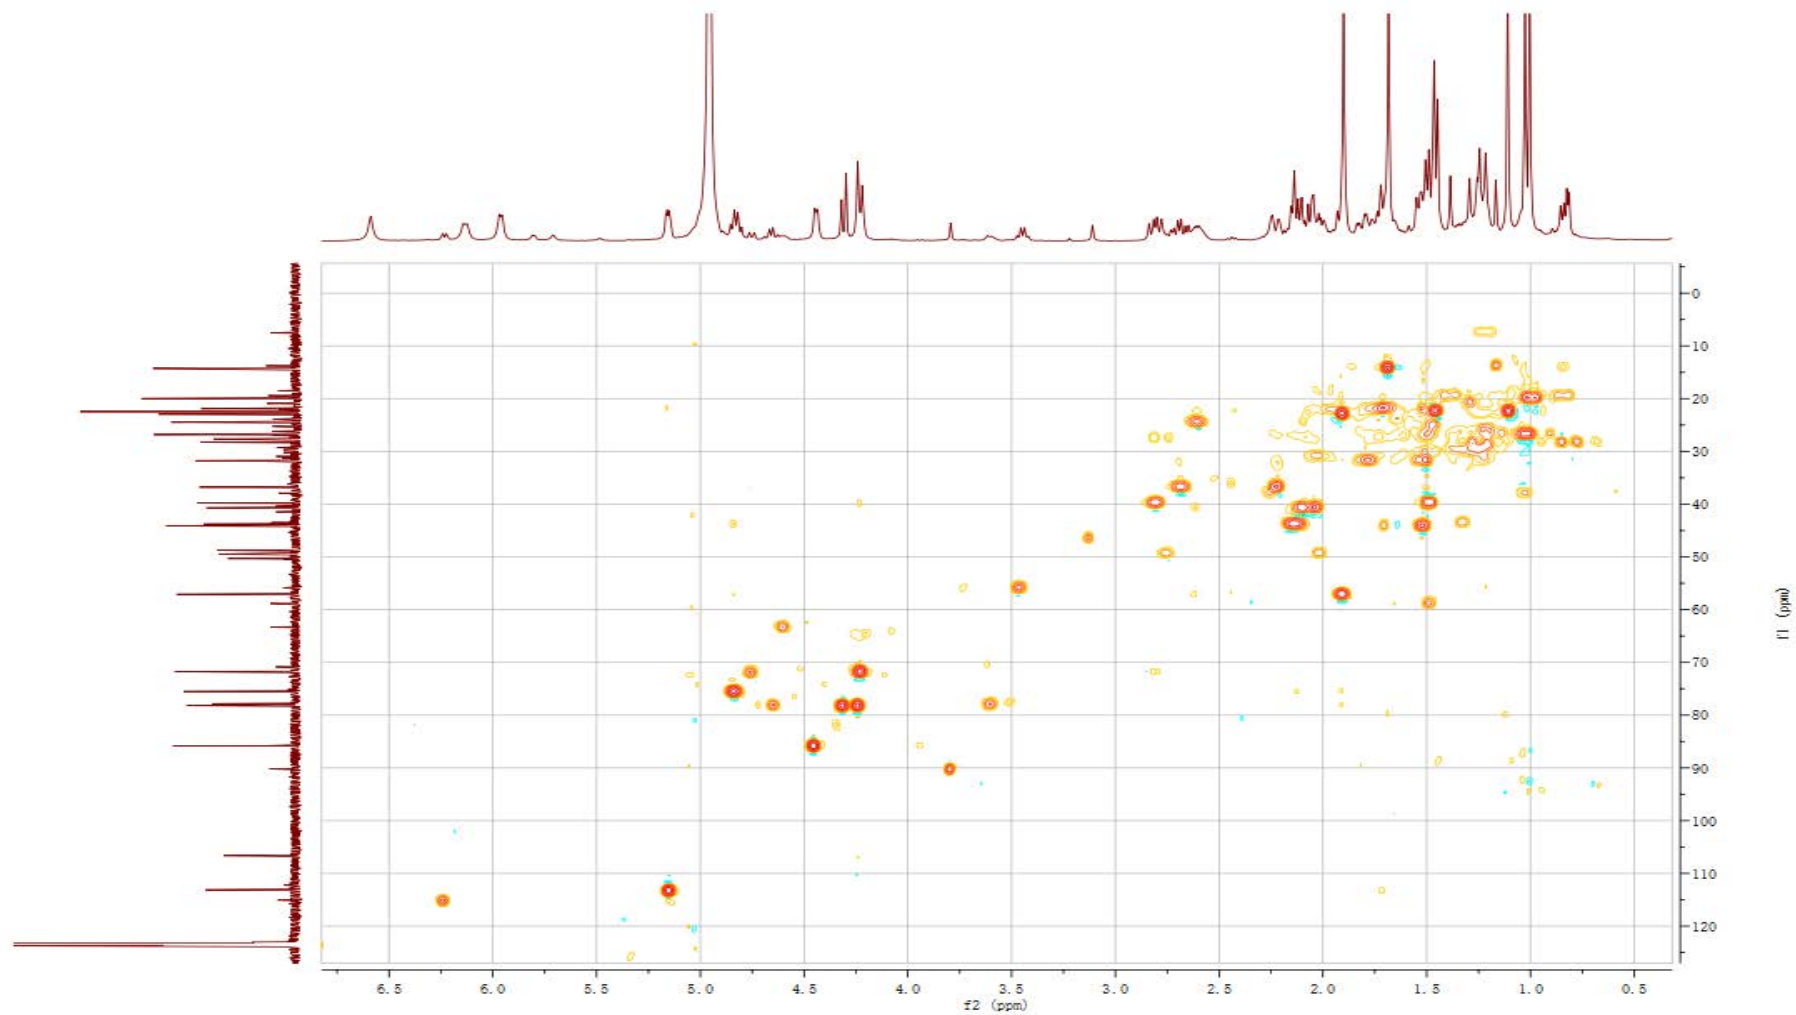

**Figure S4.** HMBC (600 Hz) Spectrum of Yunnanterpene G (**1**) in Pyridine- $d_5$

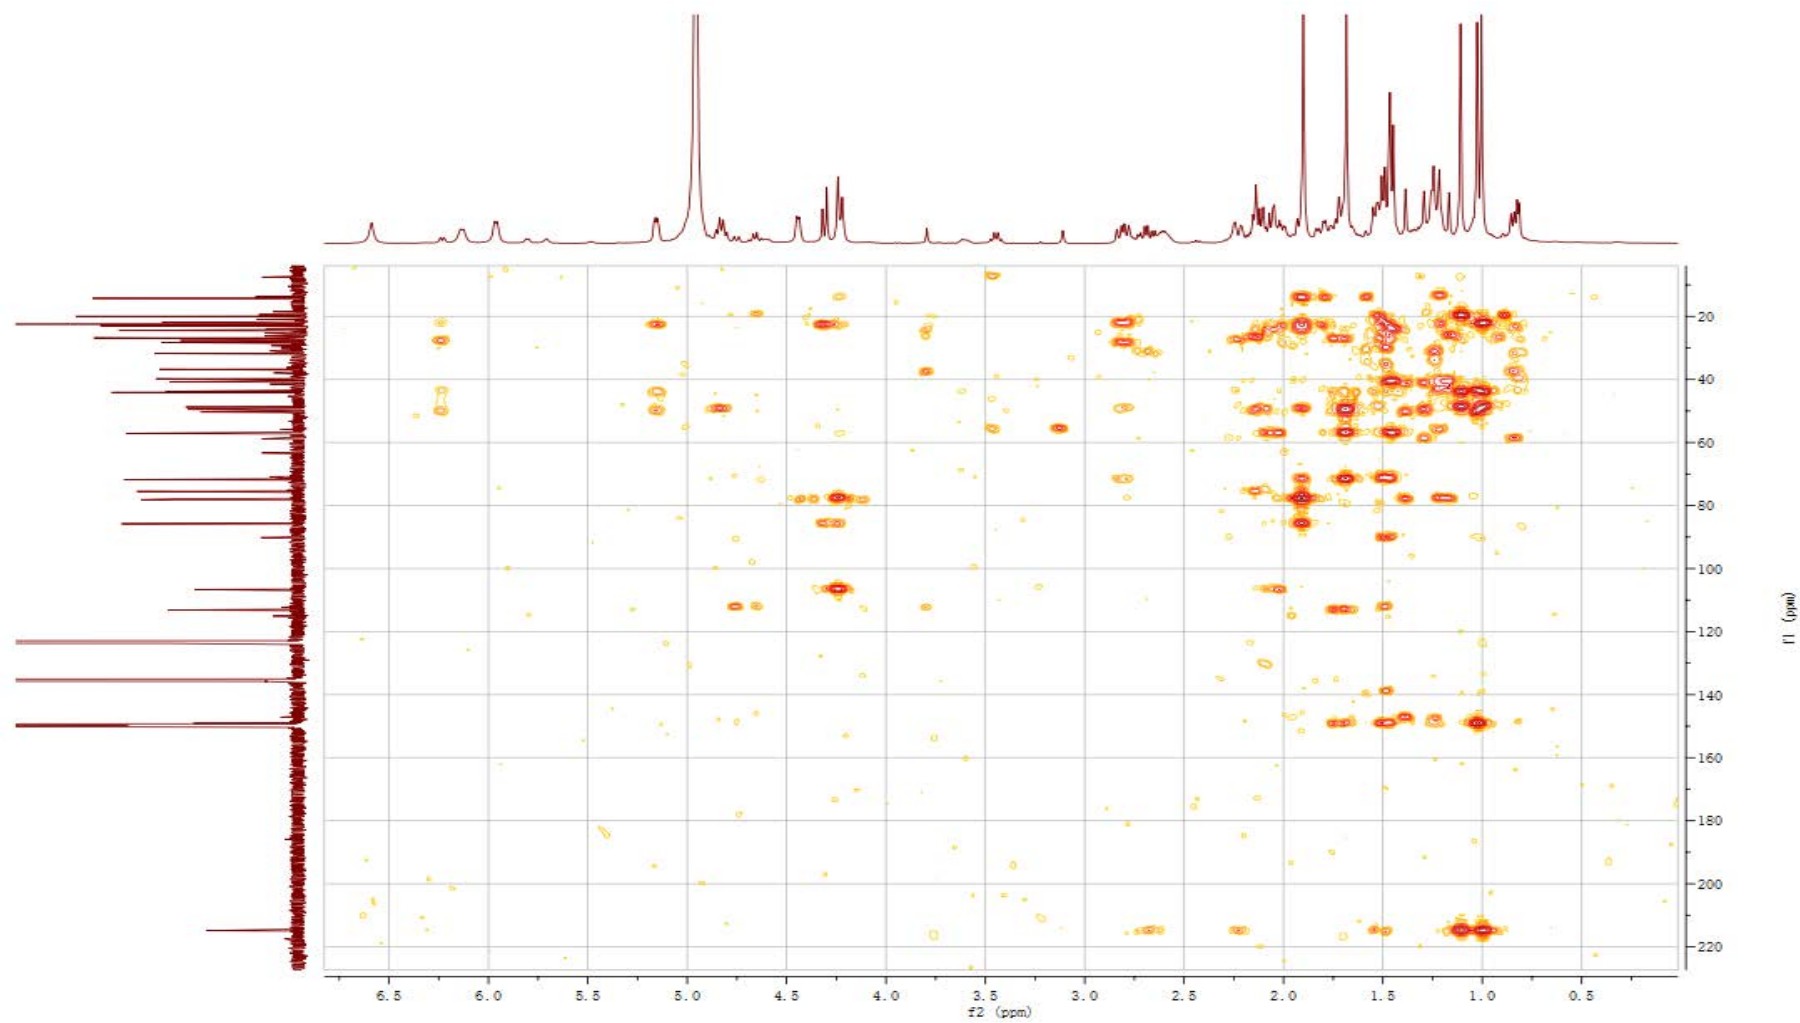

**Figure S5.**  $^1\text{H}$ - $^1\text{H}$  COSY (600 Hz) Spectrum of Yunnanterpene G (**1**) in Pyridine- $d_5$

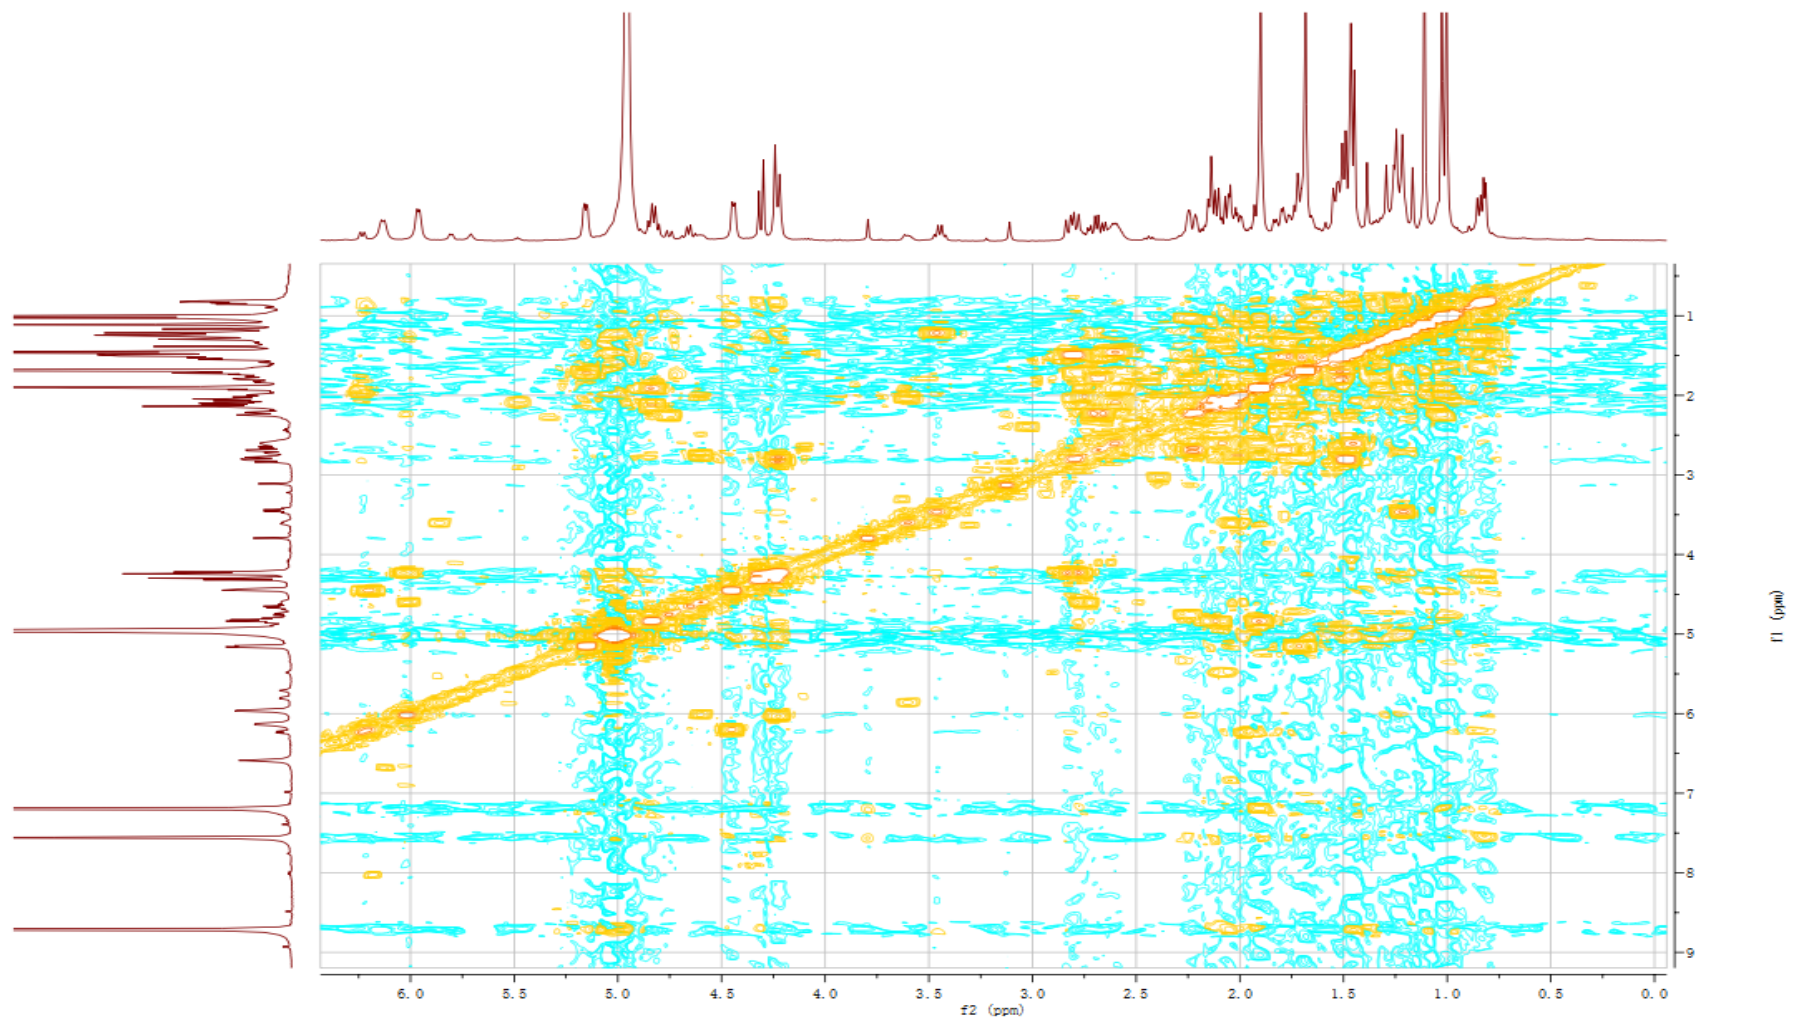

**Figure S6.** ROESY (600 Hz) Spectrum of Yunnanterpene G (**1**) in Pyridine- $d_5$

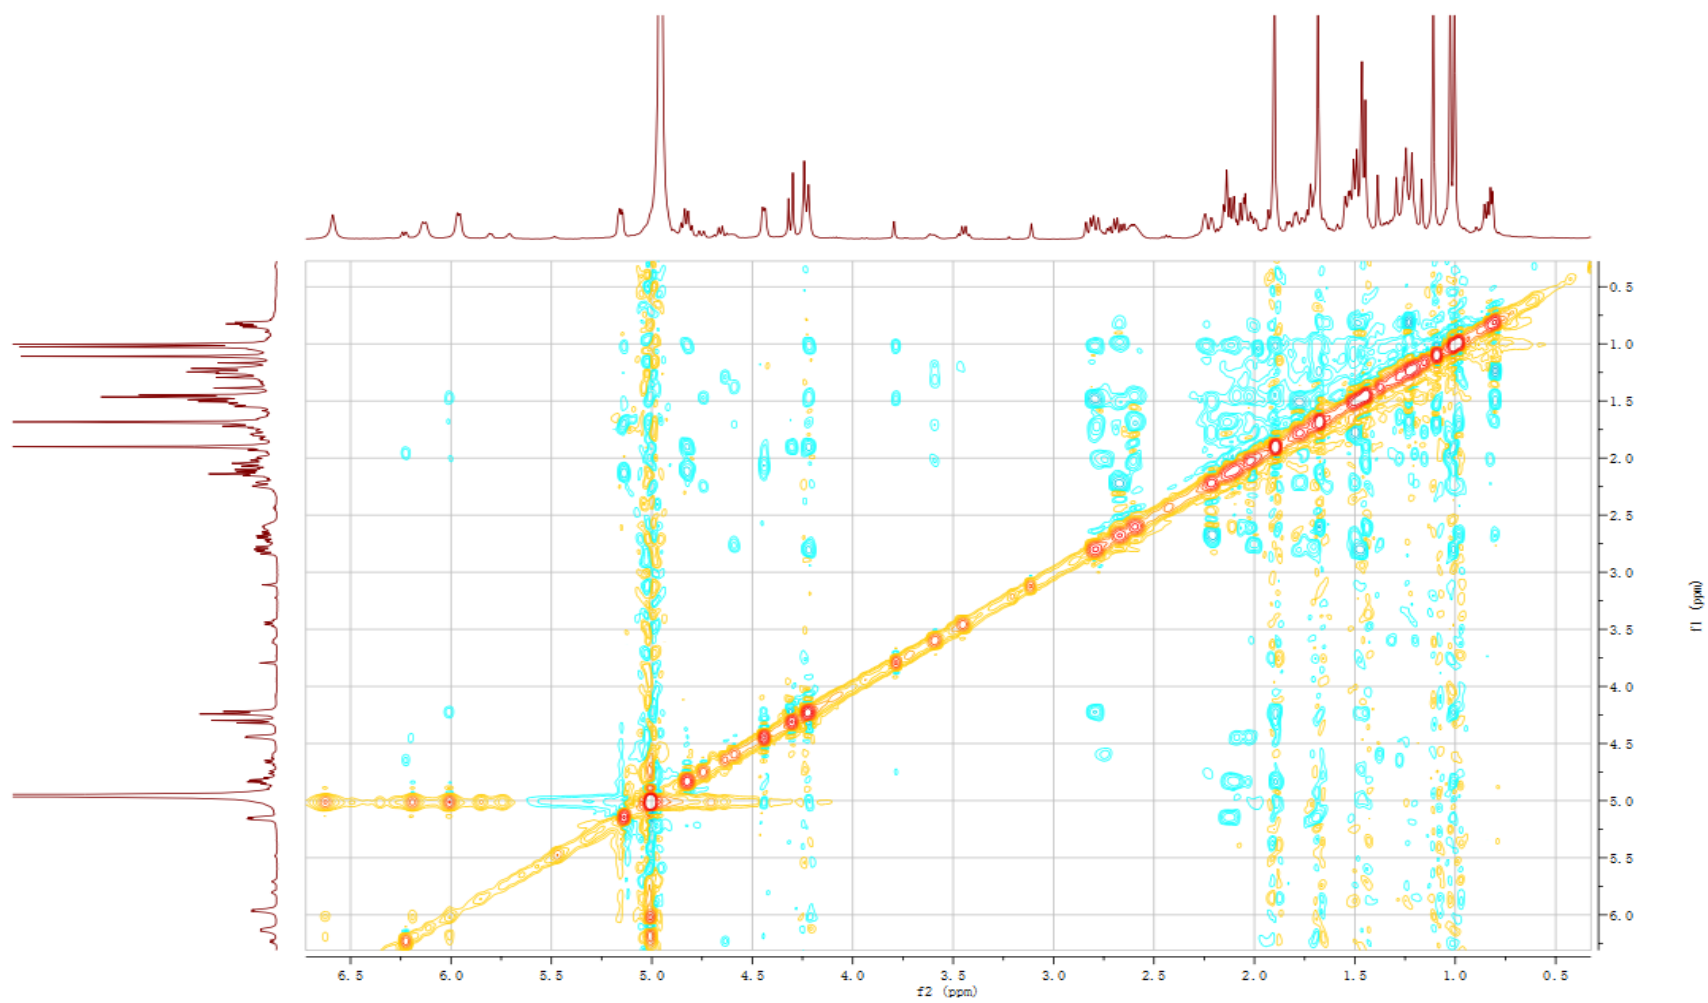



# Figure S7. HREIMS of Yunnanterpene G (1)

## Elemental Composition Report

Page 1

### Single Mass Analysis

Tolerance = 10.0 PPM / DBE: min = -10.0, max = 120.0

Selected filters: None

#### Monoisotopic Mass, Odd and Even Electron Ions

22 formula(e) evaluated with 1 results within limits (up to 51 closest results for each mass)

Elements Used:

C: 0-200 H: 0-400 O: 5-7 Na: 1-1

WQ9-9

15:16:29 20-Apr-2016

Magnet EI+

KIB

M160420E-05 15 (1.103)

Autospec Premier

P776

1

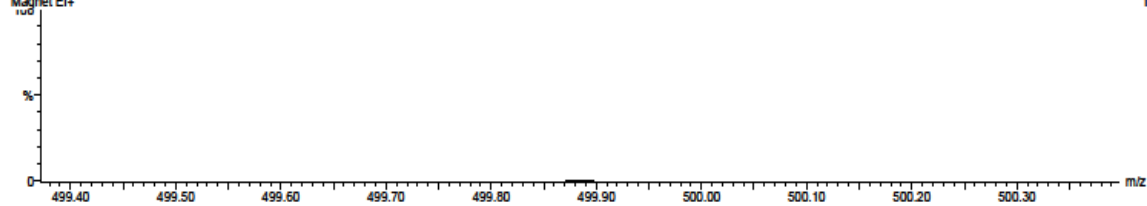

Minimum: -10.0  
Maximum: 120.0

| Mass     | Calc. Mass | mDa  | PPM  | DBE | Formula       |
|----------|------------|------|------|-----|---------------|
| 523.3029 | 523.3036   | -0.7 | -1.3 | 8.5 | C30 H44 O6 Na |

**Figure S8.** UV spectrum of Yunnanterpene G (1)

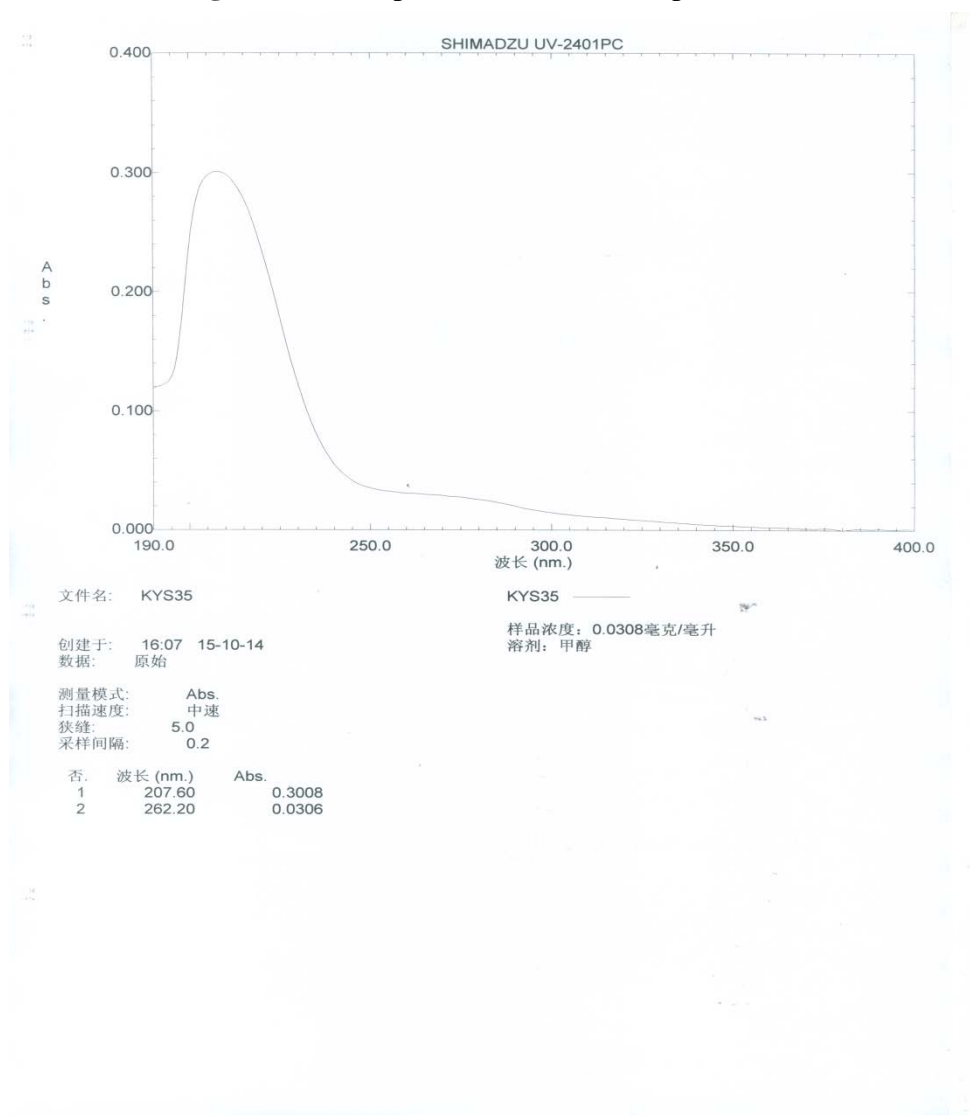

**Figure S9.** IR spectrum of Yunnanterpene G (1)

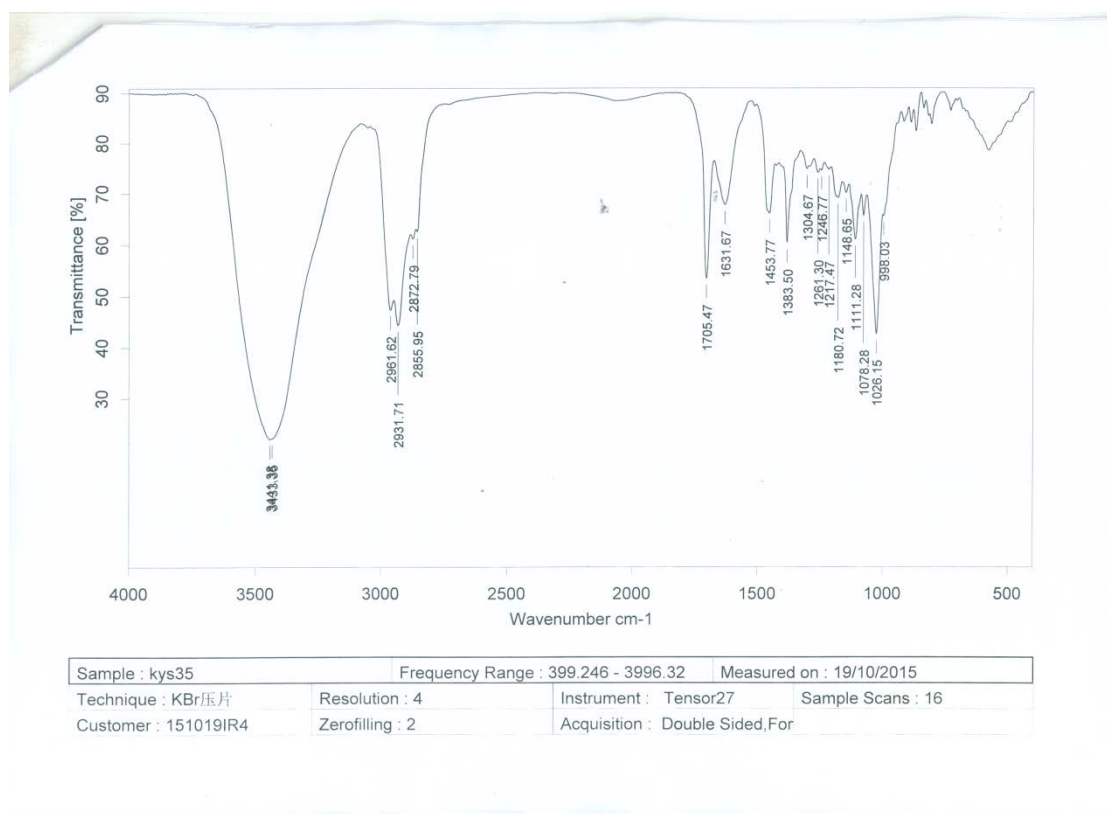

**Figure S10.  $[a]_D$  value of Yunnanterpene G (1)**

Optical rotation measurement

Model: P-1020 (A060460638)

| No.  | Sample   | Mode   | Data     | Monitor Blank     | Temp. Cell Temp Point | Date Comment Sample Name                              | Light Filter Operator | Cycle Time Integ Time |
|------|----------|--------|----------|-------------------|-----------------------|-------------------------------------------------------|-----------------------|-----------------------|
| No.1 | 21 (1/3) | Sp.Rot | -40.0000 | -0.0044<br>0.0000 | 19.2<br>10.00<br>Cell | Tue Oct 13 19:48:43 2015<br>0.00110g/mL MeOH<br>KYS35 | Na<br>589nm           | 2 sec<br>10 sec       |
| No.2 | 21 (2/3) | Sp.Rot | -40.9090 | -0.0045<br>0.0000 | 19.1<br>10.00<br>Cell | Tue Oct 13 19:48:56 2015<br>0.00110g/mL MeOH<br>KYS35 | Na<br>589nm           | 2 sec<br>10 sec       |
| No.3 | 21 (3/3) | Sp.Rot | -36.3640 | -0.0040<br>0.0000 | 19.1<br>10.00<br>Cell | Tue Oct 13 19:49:10 2015<br>0.00110g/mL MeOH<br>KYS35 | Na<br>589nm           | 2 sec<br>10 sec       |

*-39.0909°*

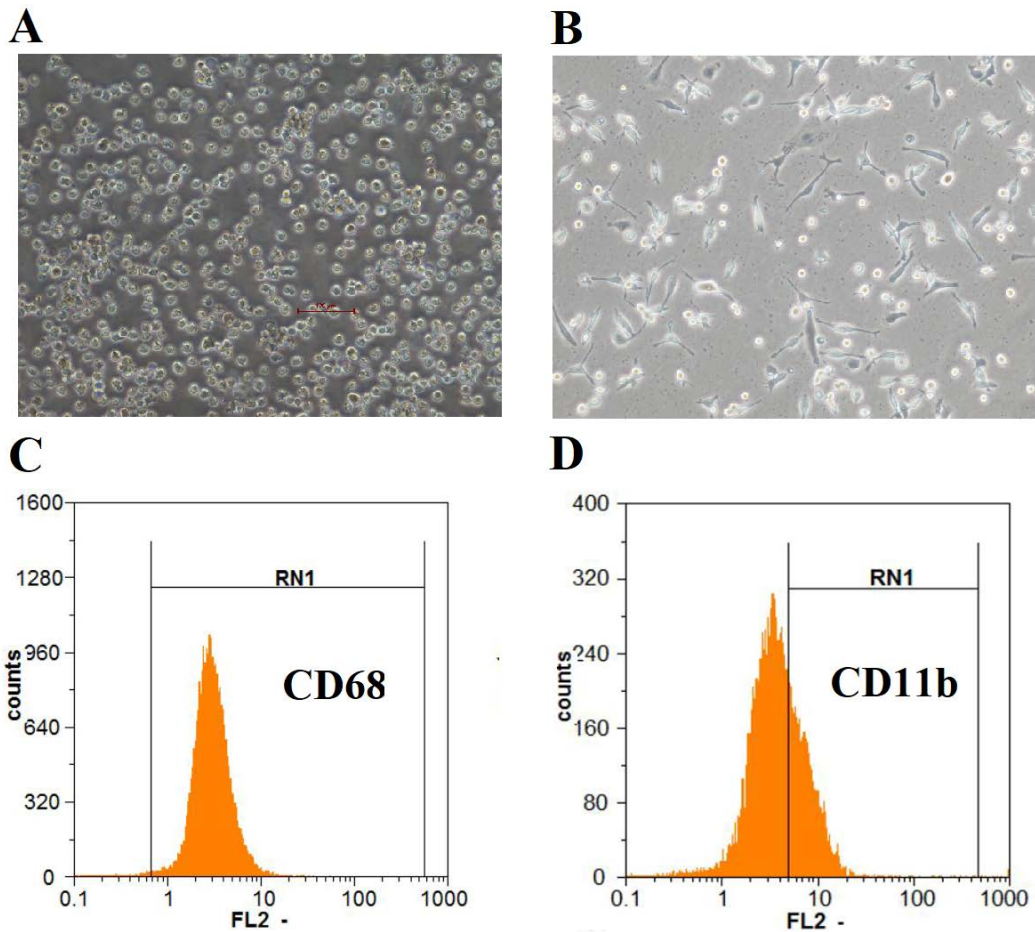

**Figure S11.** Cell morphology and expression of CD68 and CD11b of differentiated and undifferentiated THP-1 cells. **A.** Undifferentiated THP-1 cells; **B.** Induction of monocyte-macrophage differentiation by 100 nM PMA for 24 h; **C.** CD68 expression of the differentiated cells; **D.** CD11b expression of the differentiated cells. Expression of CD68 and CD11b were measured by flow cytometry using FITC-labeled anti-CD68 mAb and anti-CD11b mAb. Analysis was conducted on a PARTEC brand flow cytometer.

**Table S1.** Primers' information for CD147 and MMPs in the present study

|                     |              |
|---------------------|--------------|
| CTGGTACAAGATCACTGAC | EMMPRIN(H)-F |
| GAGGAACTCACGAAGAAC  | EMMPRIN(H)-R |
| CTGAAGGACACACTAAAGA | MMP2(H)-F    |
| CGATGGTATTCTGGTCAA  | MMP2(H)-R    |
| GGCAGATTCCAAACCTTT  | MMP9(H)-F    |
| GCAAGTCTCCGAGTAGT   | MMP9(H)-R    |
| TCCATCAACACTGCCTAC  | MMP14(H)-F   |
| CCTCATCAAACACCCAATG | MMP14(H)-R   |
| AAAGGGTCATCATCTCTG  | GAPDH-F      |
| GCTGTTGTCATACTTCTC  | GAPDH-R      |
